# Supplementary material for: Current Perspectives on the Use of Alternative Species in Human Health and Ecological Hazard Assessments
Source: PubMed Central journal article supplement (PMC3764090; doi:10.1289/ehp.1306638), 2013-06-14
Supplement: ehp.1306638.s001.pdf [file ehp.1306638.s001.pdf]

**Supplemental Material**

**Current Perspectives on the Use of Alternative Species in Human  
Health and Ecological Hazard Assessments**

Edward J. Perkins, Gerald T. Ankley, Kevin M. Crofton, Natália Garcia-Reyero, Carlie  
A. LaLone, Mark S. Johnson, Joseph E. Tietge, and Daniel L. Villeneuve

## Table of Contents

|                                                                                 |      |
|---------------------------------------------------------------------------------|------|
| Figure S1. Results for bisphenol A tested in the ToxCast™ battery of assays     | p 3  |
| Figure S2. Results for prochloraz tested in the ToxCast™ battery of assays      | p 4  |
| Figure S3. Results for propiconazole A tested in the ToxCast™ battery of assays | p 5  |
| Figure S4. Results for fipronil tested in the ToxCast™ battery of assays        | p 6  |
| Figure S5. Results for prometon tested in the ToxCast™ battery of assays        | p 7  |
| Figure S6. Results for atrazine tested in the ToxCast™ battery of assays        | p 8  |
| Figure S7. Results for methoxychlor tested in the ToxCast™ battery of assays    | p 9  |
| Figure S8. Results for vinclozolin tested in the ToxCast™ battery of assays     | p 10 |
| Figure S9. Results for fenarimol tested in the ToxCast™ battery of assays       | p 11 |
| Reference.                                                                      | p 12 |

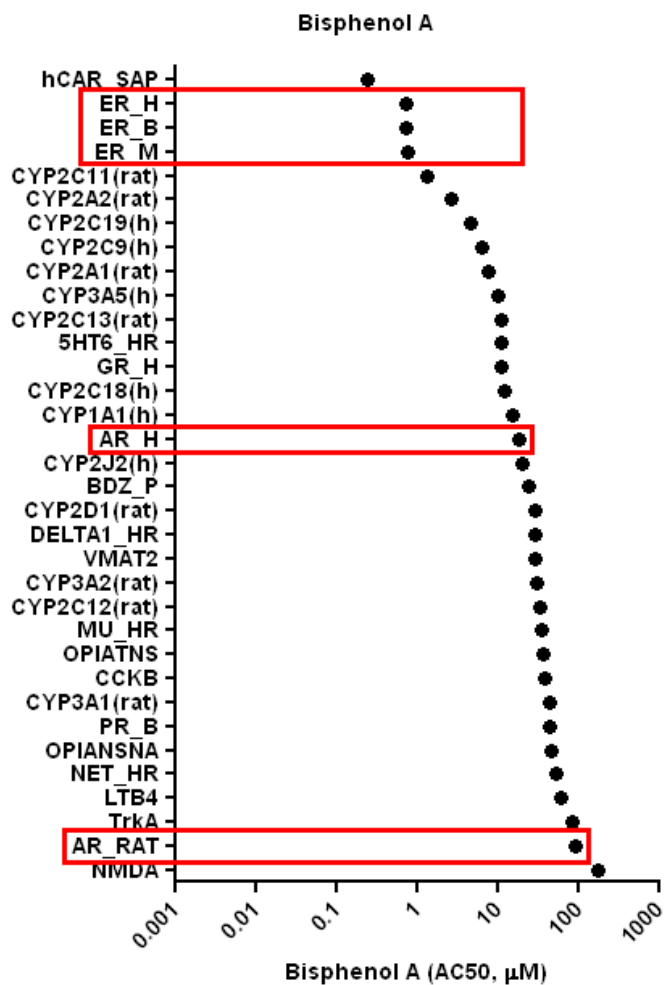

**Supplemental Material, Figure S1.** Molecular screening assay results for bisphenol A tested in the ToxCast<sup>TM</sup> battery of assays (Derived from Knudsen et al. 2011). An AC50 is the *in vitro* chemical concentration yielding 50% of the maximal activity produced by an assay-specific standard chemical. Assays were identified in which a significant response was detected. Assays were then ranked by AC50. Assays relevant to molecular initiating events associated with established reproductive adverse outcome pathways of fathead minnow (*Pimephales promelas*) are outlined in red.

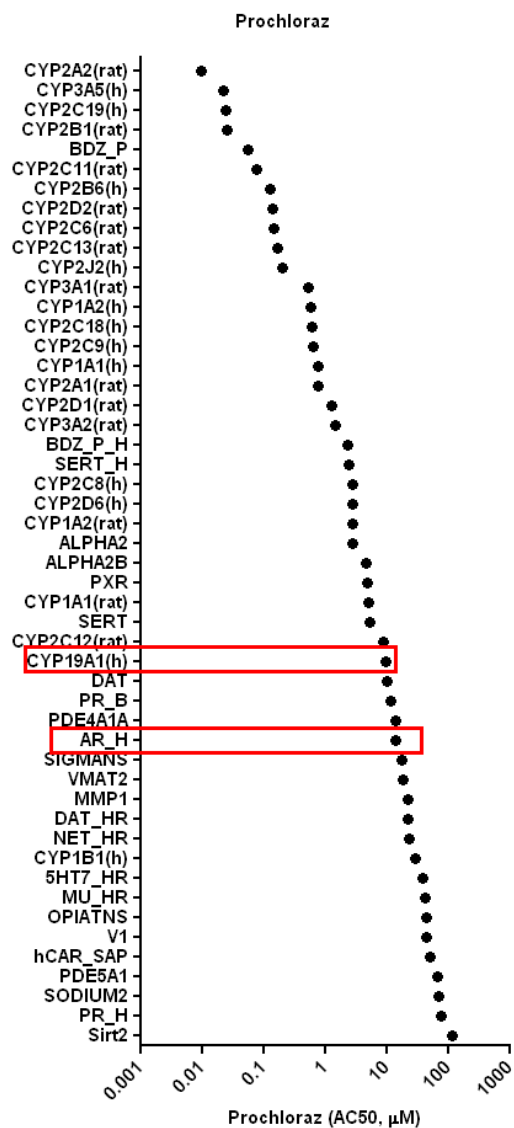

**Supplemental Material, Figure S2.** Molecular screening assay results for prochloraz tested in the ToxCast™ battery of assays (Derived from Knudsen et al. 2011). An AC50 is the *in vitro* chemical concentration yielding 50% of the maximal activity produced by an assay-specific standard chemical. Assays were identified in which a significant response was detected. Assays were then ranked by AC50. Assays relevant to molecular initiating events associated with established reproductive adverse outcome pathways of fathead minnow (*Pimephales promelas*) are outlined in red.

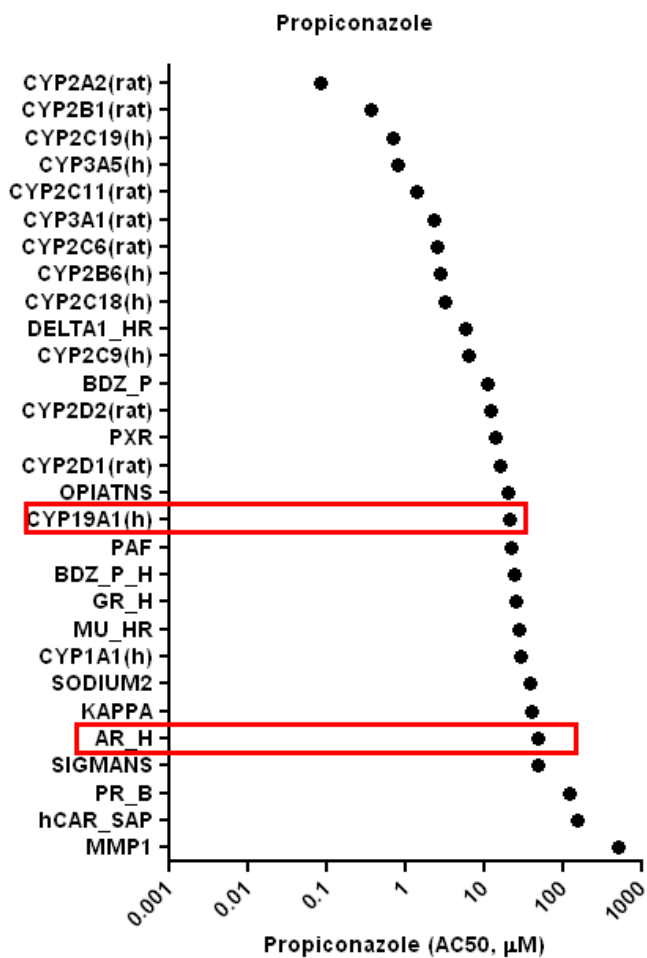

**Supplemental Material, Figure S3.** Molecular screening assay results for propiconazole tested in the ToxCast™ battery of assays (Derived from Knudsen et al. 2011). An AC50 is the *in vitro* chemical concentration yielding 50% of the maximal activity produced by an assay-specific standard chemical. Assays were identified in which a significant response was detected. Assays were then ranked by AC50. Assays relevant to molecular initiating events associated with established reproductive adverse outcome pathways of fathead minnow (*Pimephales promelas*) are outlined in red.

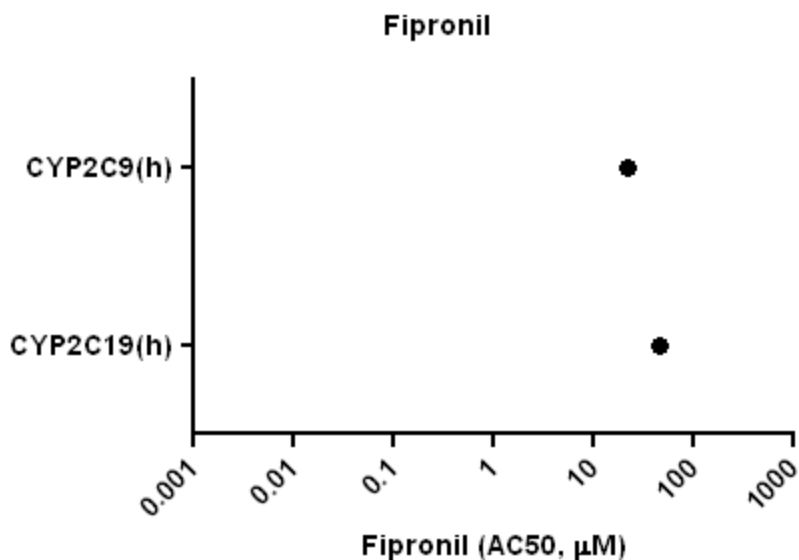

**Supplemental Material, Figure S4.** Molecular screening assay results for fipronil tested in the ToxCast™ battery of assays (Derived from Knudsen et al. 2011). An AC50 is the *in vitro* chemical concentration yielding 50% of the maximal activity produced by an assay-specific standard chemical. Assays were identified in which a significant response was detected. Assays were then ranked by AC50. Assays relevant to molecular initiating events associated with established reproductive adverse outcome pathways of fathead minnow (*Pimephales promelas*) are outlined in red.

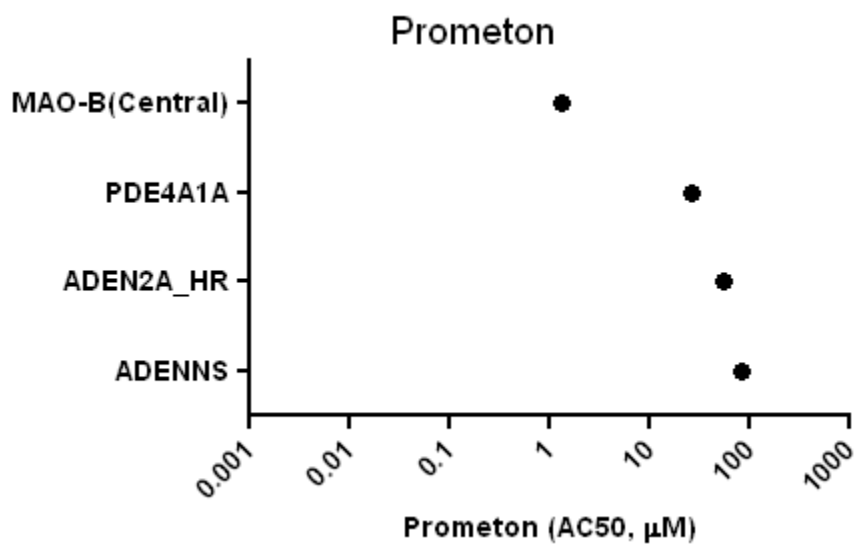

**Supplemental Material, Figure S5.** Molecular screening assay results for prometon tested in the ToxCast™ battery of assays (Derived from Knudsen et al. 2011). An AC50 is the *in vitro* chemical concentration yielding 50% of the maximal activity produced by an assay-specific standard chemical. Assays were identified in which a significant response was detected. Assays were then ranked by AC50. Assays relevant to molecular initiating events associated with established reproductive adverse outcome pathways of fathead minnow (*Pimephales promelas*) are outlined in red.

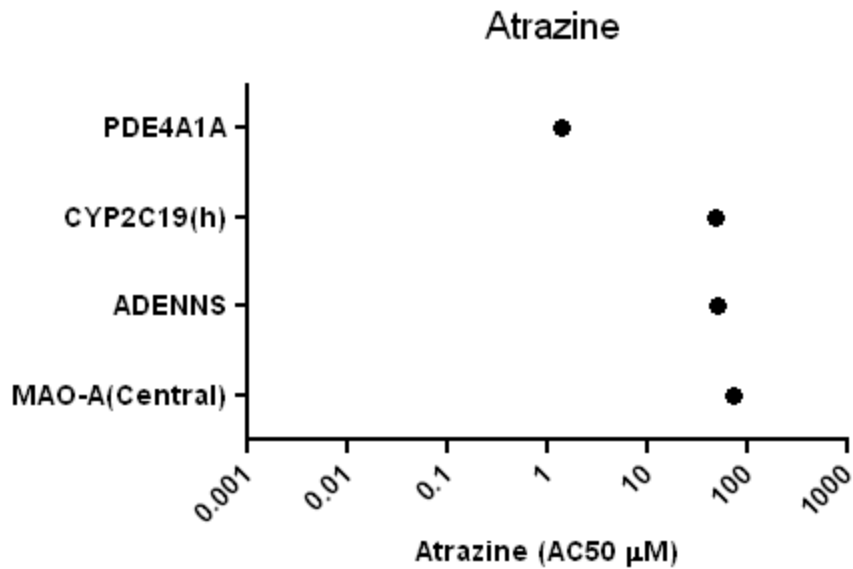

**Supplemental Material, Figure S6.** Molecular screening assay results for atrazine tested in the ToxCast™ battery of assays (Derived from Knudsen et al. 2011). An AC50 is the *in vitro* chemical concentration yielding 50% of the maximal activity produced by an assay-specific standard chemical. Assays were identified in which a significant response was detected. Assays were then ranked by AC50. Assays relevant to molecular initiating events associated with established reproductive adverse outcome pathways of fathead minnow (*Pimephales promelas*) are outlined in red.



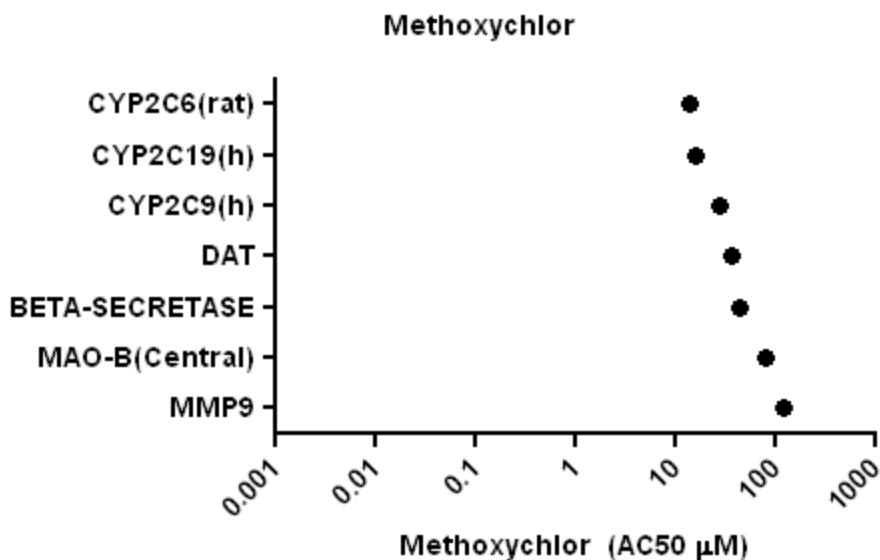

**Supplemental Material, Figure S7.** Molecular screening assay results for methoxychlor tested in the ToxCast™ battery of assays (Derived from Knudsen et al. 2011). An AC50 is the *in vitro* chemical concentration yielding 50% of the maximal activity produced by an assay-specific standard chemical. Assays were identified in which a significant response was detected. Assays were then ranked by AC50. Assays relevant to molecular initiating events associated with established reproductive adverse outcome pathways of fathead minnow (*Pimephales promelas*) are outlined in red.

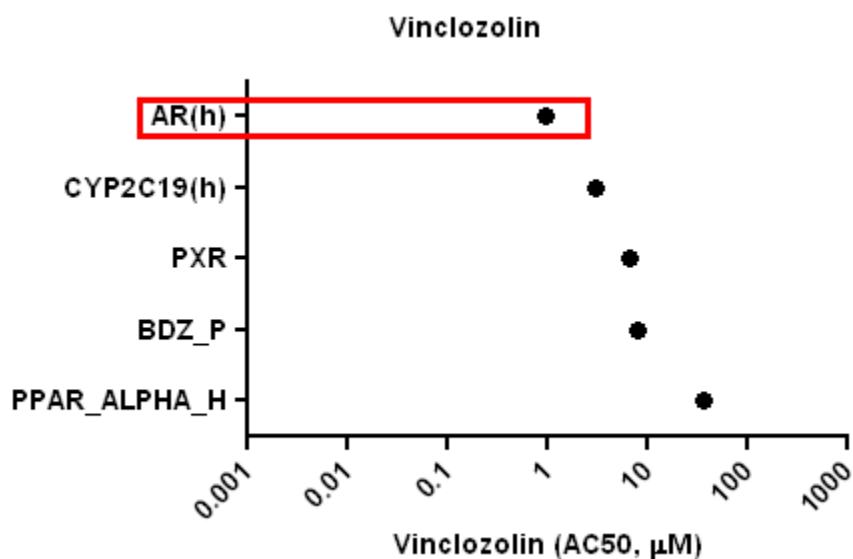

**Supplemental Material, Figure S8.** Molecular screening assay results for vinclozolin tested in the ToxCast™ battery of assays (Derived from Knudsen et al. 2011). An AC50 is the *in vitro* chemical concentration yielding 50% of the maximal activity produced by an assay-specific standard chemical. Assays were identified in which a significant response was detected. Assays were then ranked by AC50. Assays relevant to molecular initiating events associated with established reproductive adverse outcome pathways of fathead minnow (*Pimephales promelas*) are outlined in red.

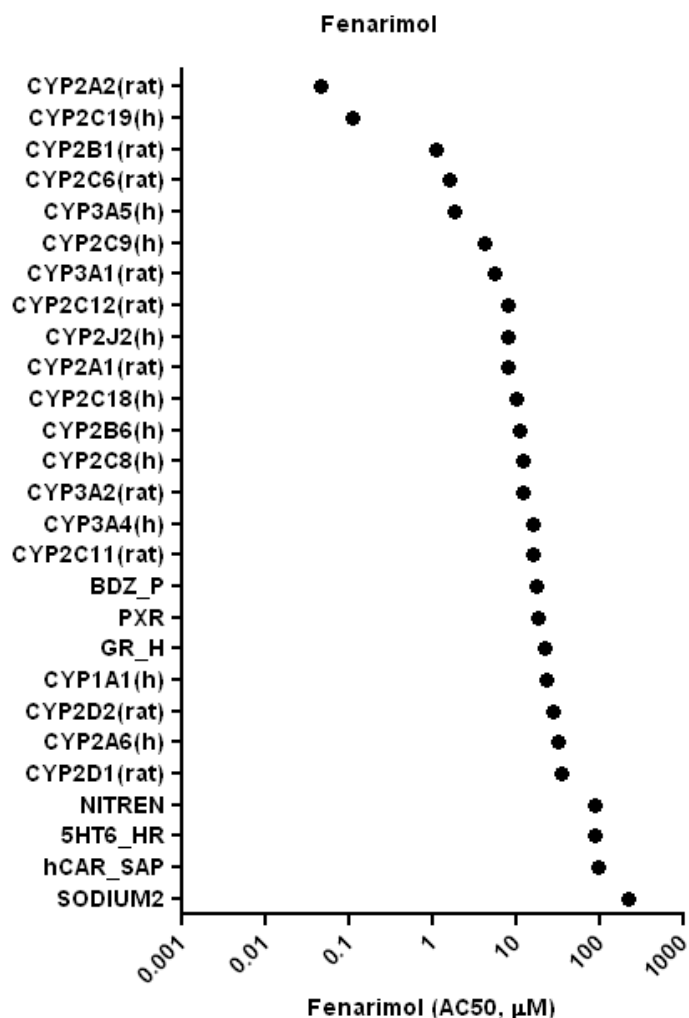

**Supplemental Material, Figure S9.** Molecular screening assay results for fenarimol tested in the ToxCast<sup>TM</sup> battery of assays (Derived from Knudsen et al. 2011). An AC50 is the *in vitro* chemical concentration yielding 50% of the maximal activity produced by an assay-specific standard chemical. Assays were identified in which a significant response was detected. Assays were then ranked by AC50. Assays relevant to molecular initiating events associated with established reproductive adverse outcome pathways of fathead minnow (*Pimephales promelas*) are outlined in red.

## Reference

Knudsen TB, Houck KA, Sipes NS, Singh AV, Judson RS, Martin MT, et al. 2011. Activity profiles of 309 ToxCast™ chemicals evaluated across 292 biochemical targets. *J Toxicol* 282:1–15; doi:10.1016/j.tox.2010.12.010.
